# Supplementary material for: The Sequence-specific Peptide-binding Activity of the Protein Sulfide Isomerase AGR2 Directs Its Stable Binding to the Oncogenic Receptor EpCAM
Source: PubMed Central journal article supplement (PMC5880107; doi:10.1074/mcp.ra118.000573), 2018-01-16

**8-15: NYKLAVNC**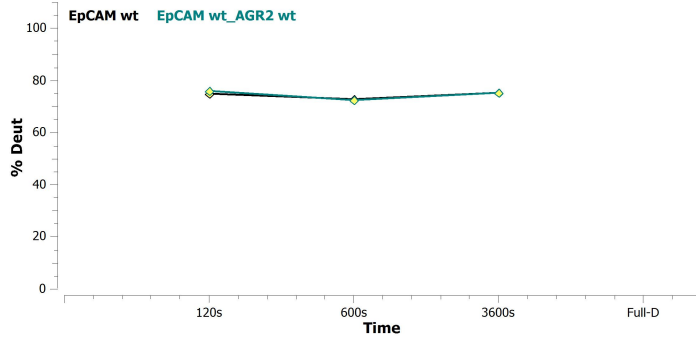**16-25: FVNNRQCQC**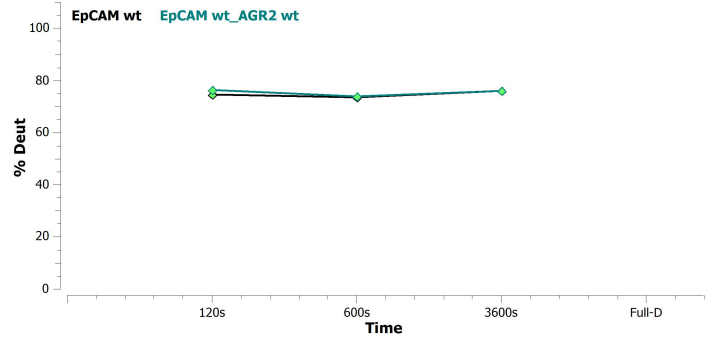**47-71: KAEMNGSKLRRRAKPEGALQNNNDGL**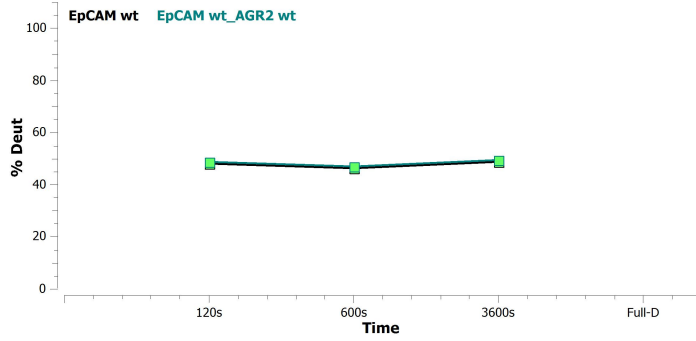**47-78: KAEMNGSKLRRRAKPEGALQNNNDGLYDPCDE**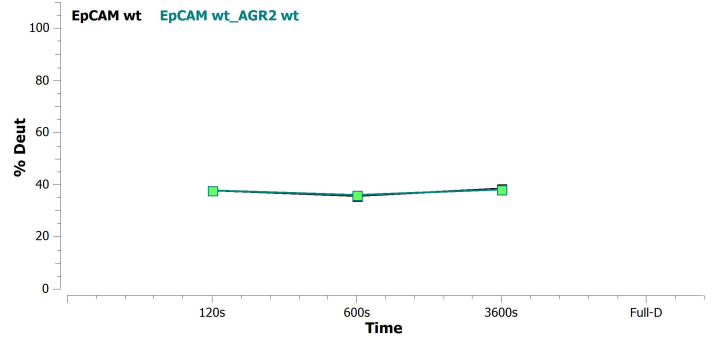**47-81: KAEMNGSKLRRRAKPEGALQNNNDGLYDPCDEESGL**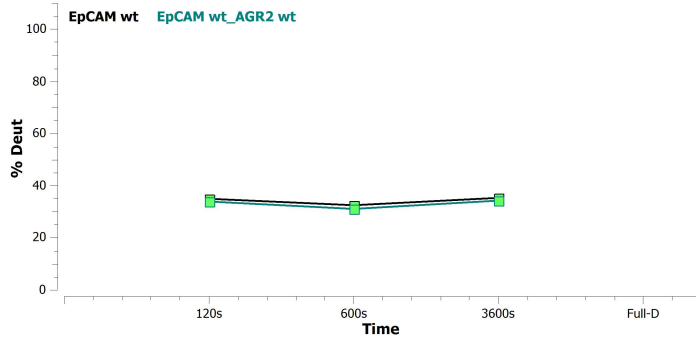**56-78: GRRRAKPEGALQNNNDGLYDPCDE**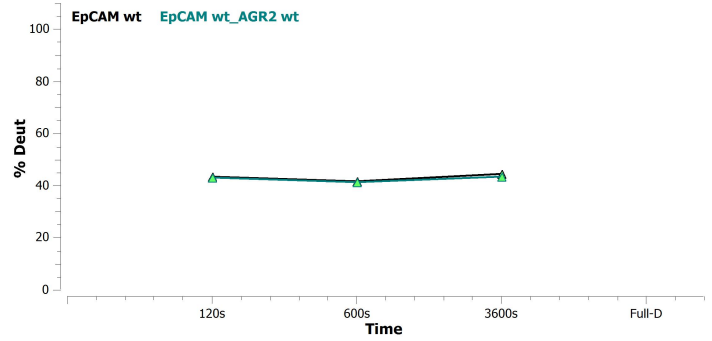**82-93: FKAQCNQNGTSMC**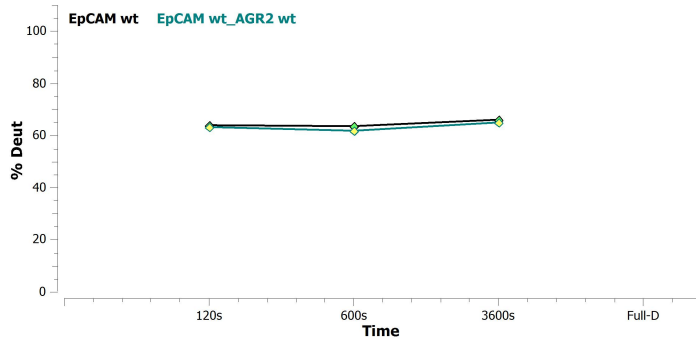**95-111: CVNTAGVRRRTDKDTEIT**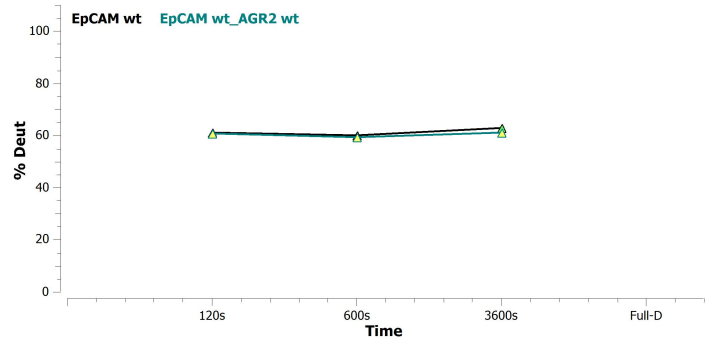**123-138: IELKHKAREKPYDSKS**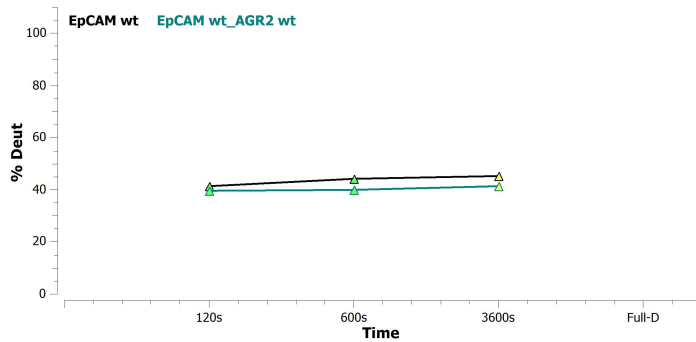**123-143: IELKHKAREKPYDSKSLRTAL**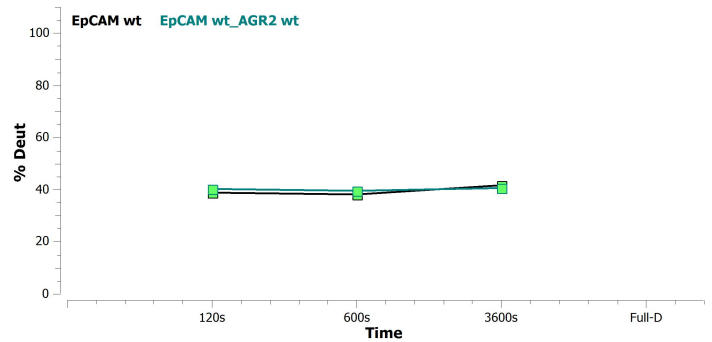

125-143: LKKHKAREKPYDSKSLRTAL

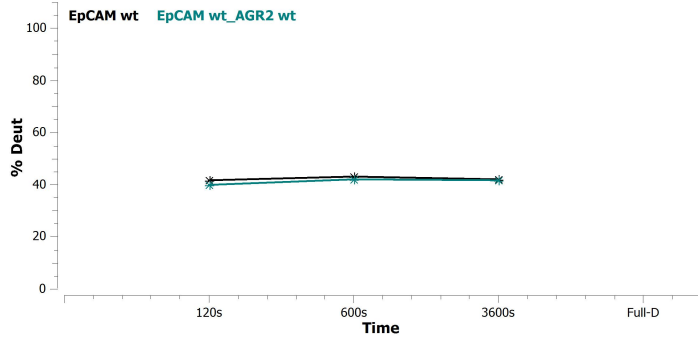

142-157: ALQKEITTRYQLDPKF

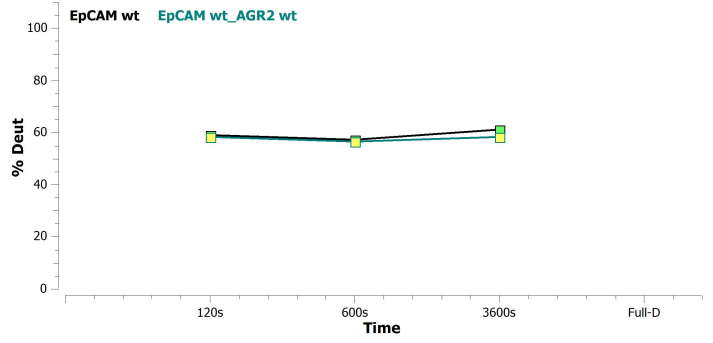

144-157: QKEITTRYQLDPKF

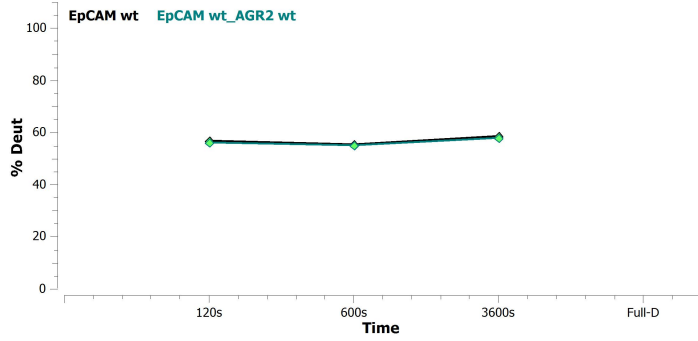

144-162: QKEITTRYQLDPKFITSIL

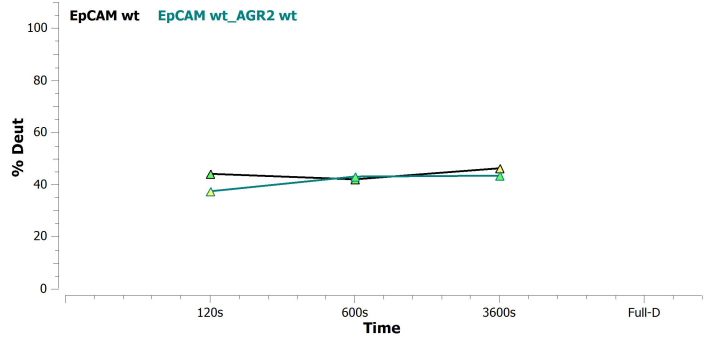

144-182: QKEITTRYQLDPKFITSILYENNVITIDLQVNSSQKTQN

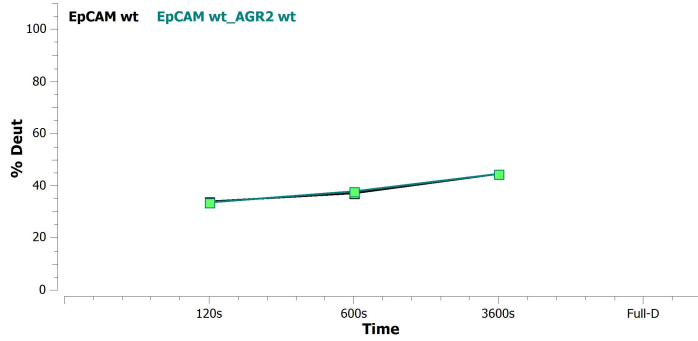

144-185: QKEITTRYQLDPKFITSILYENNVITIDLQVNSSQKTQNDVD

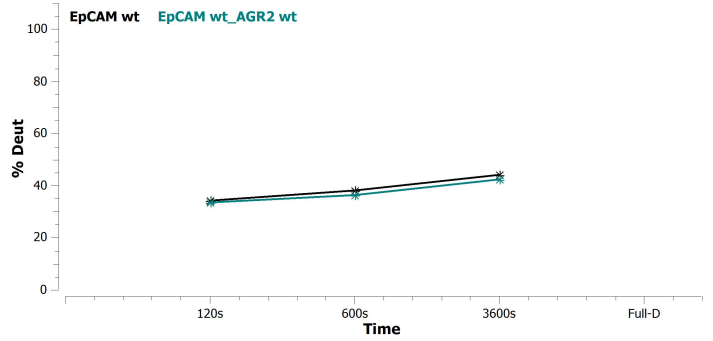

147-157: ITTRYQLDPKF

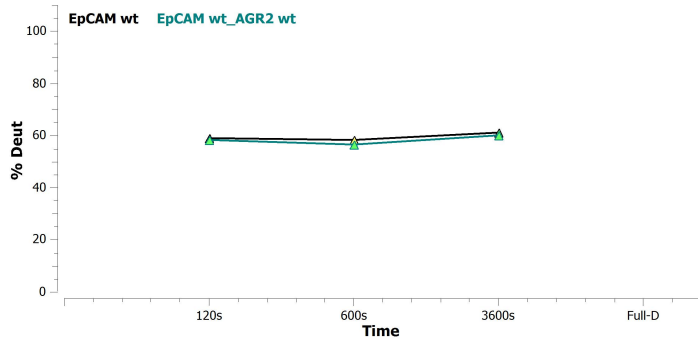

170-182: IDLVQNSSQKTQN

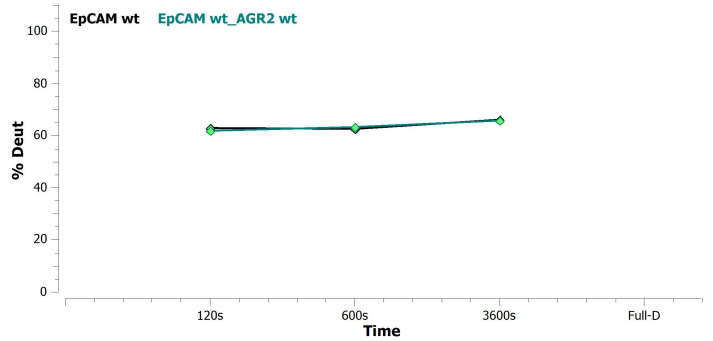

170-185: IDLVQNSSQKTQNDVD

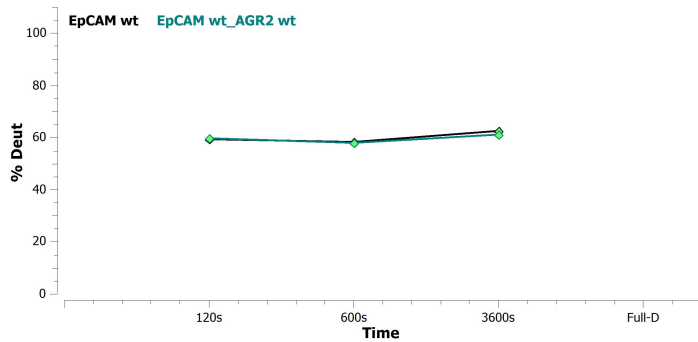

172-185: LVQNSSQKTQNDVD

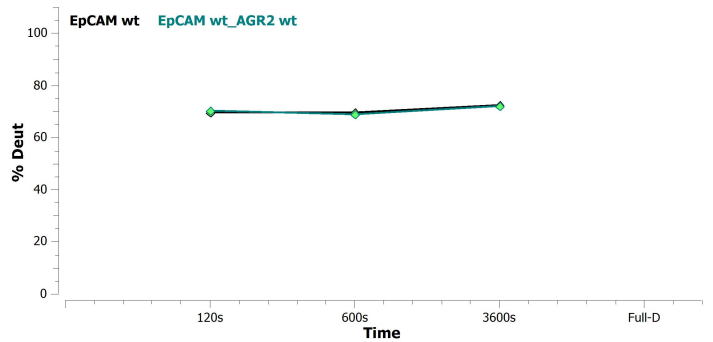

192-202: YFEKDVKGESL

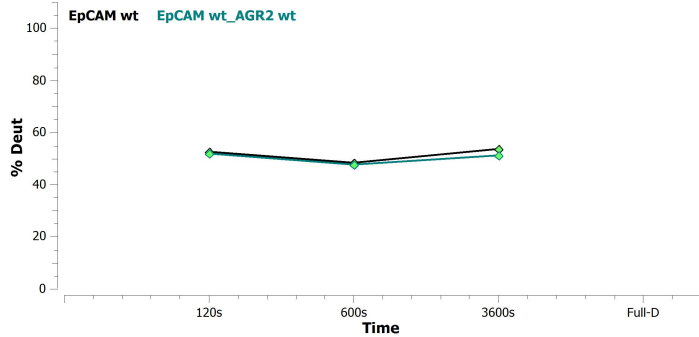

192-203: YFEKDVKGESLF

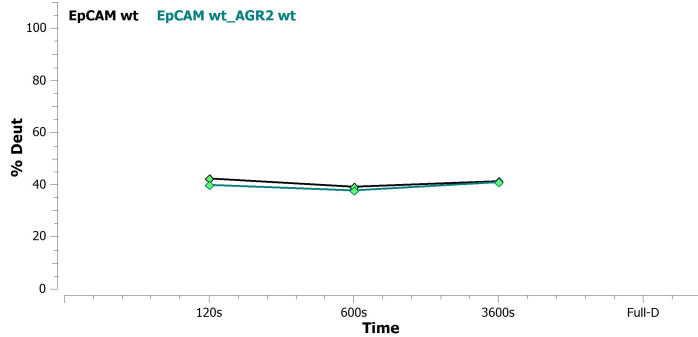

192-210: YFEKDVKGESLFHSHKMDL

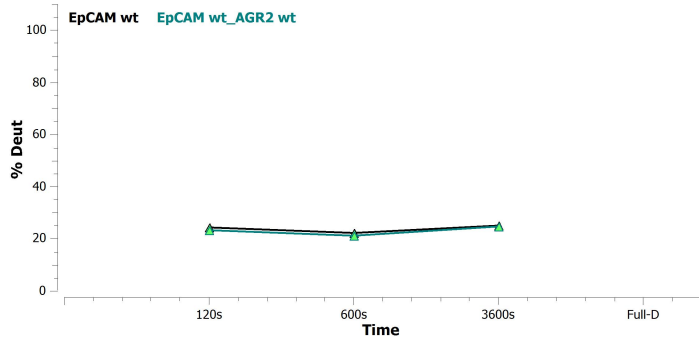

192-217: YFEKDVKGESLFHSHKMDLTVNGEQL

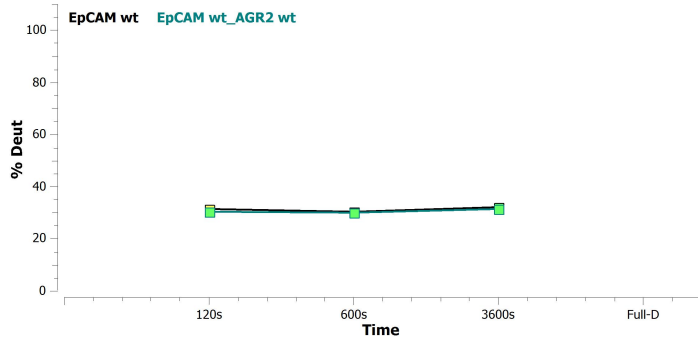

193-210: FEKDVKGESLFHSHKMDL

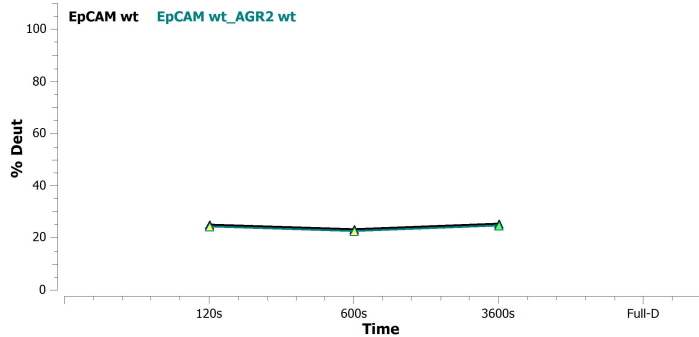

193-217: FEKDVKGESLFHSHKMDLTVNGEQL

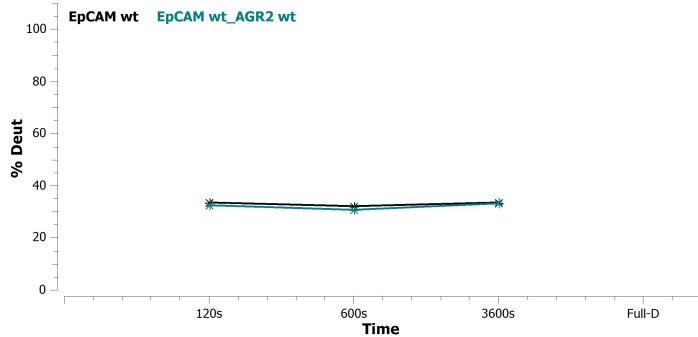

203-210: FHSKKMDL

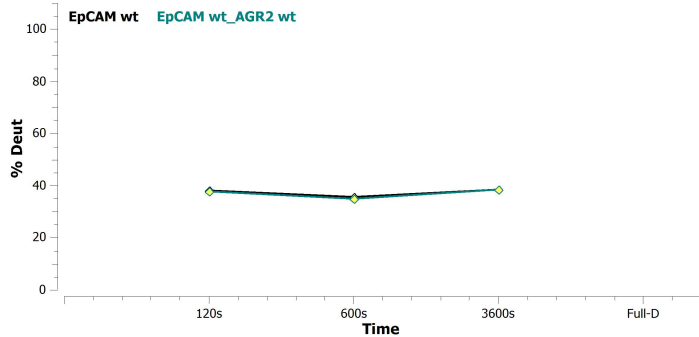

203-217: FHSKKMDLTVNGEQL

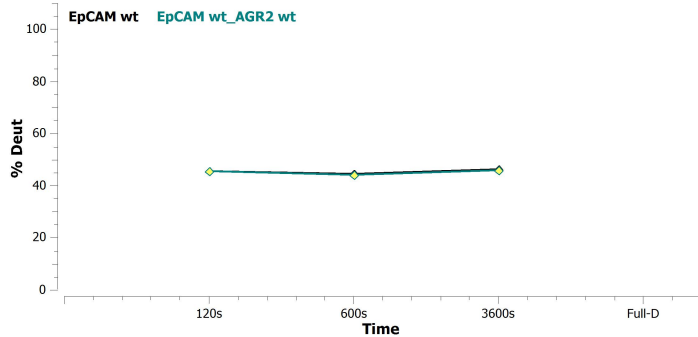

217-227: LDLDPGQTLIY

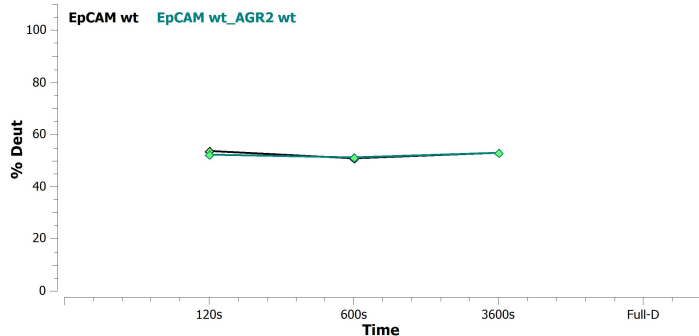

226-236: IYYVDEKAPEF

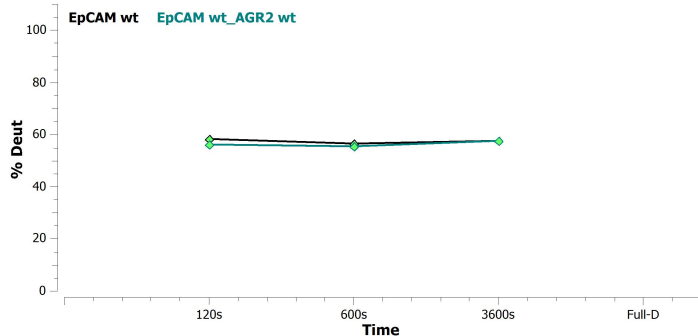

### 227-236: YYVDEKAPEF

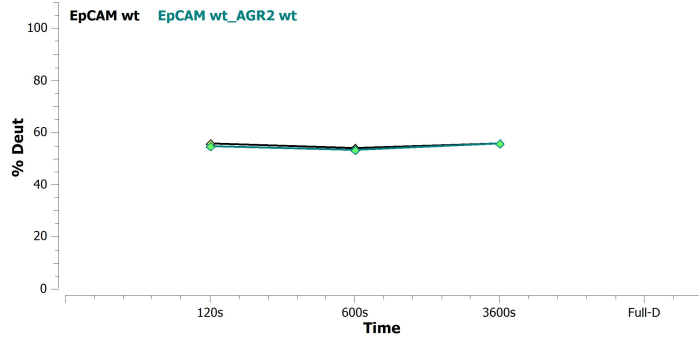

### 228-236: YVDEKAPEF

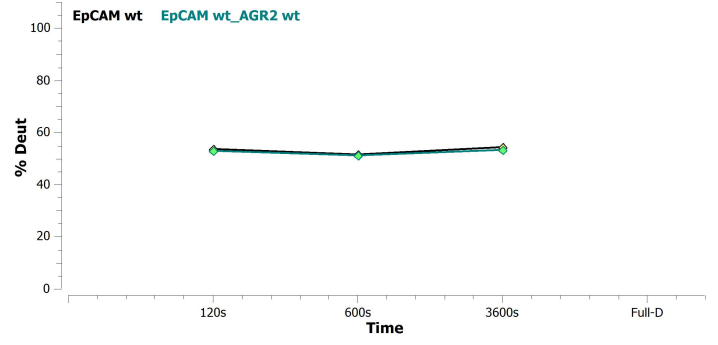

Supplement: supp_RA118.000573_134890_0_supp_50205_p258tz.pdf [file supp_RA118.000573_134890_0_supp_50205_p258tz.pdf]
